# Supplementary material for: HMM Logos for visualization of protein families
Source: Springer Nature journal article supplement (doi:10.1186/1471-2105-5-7), 2004-01-21

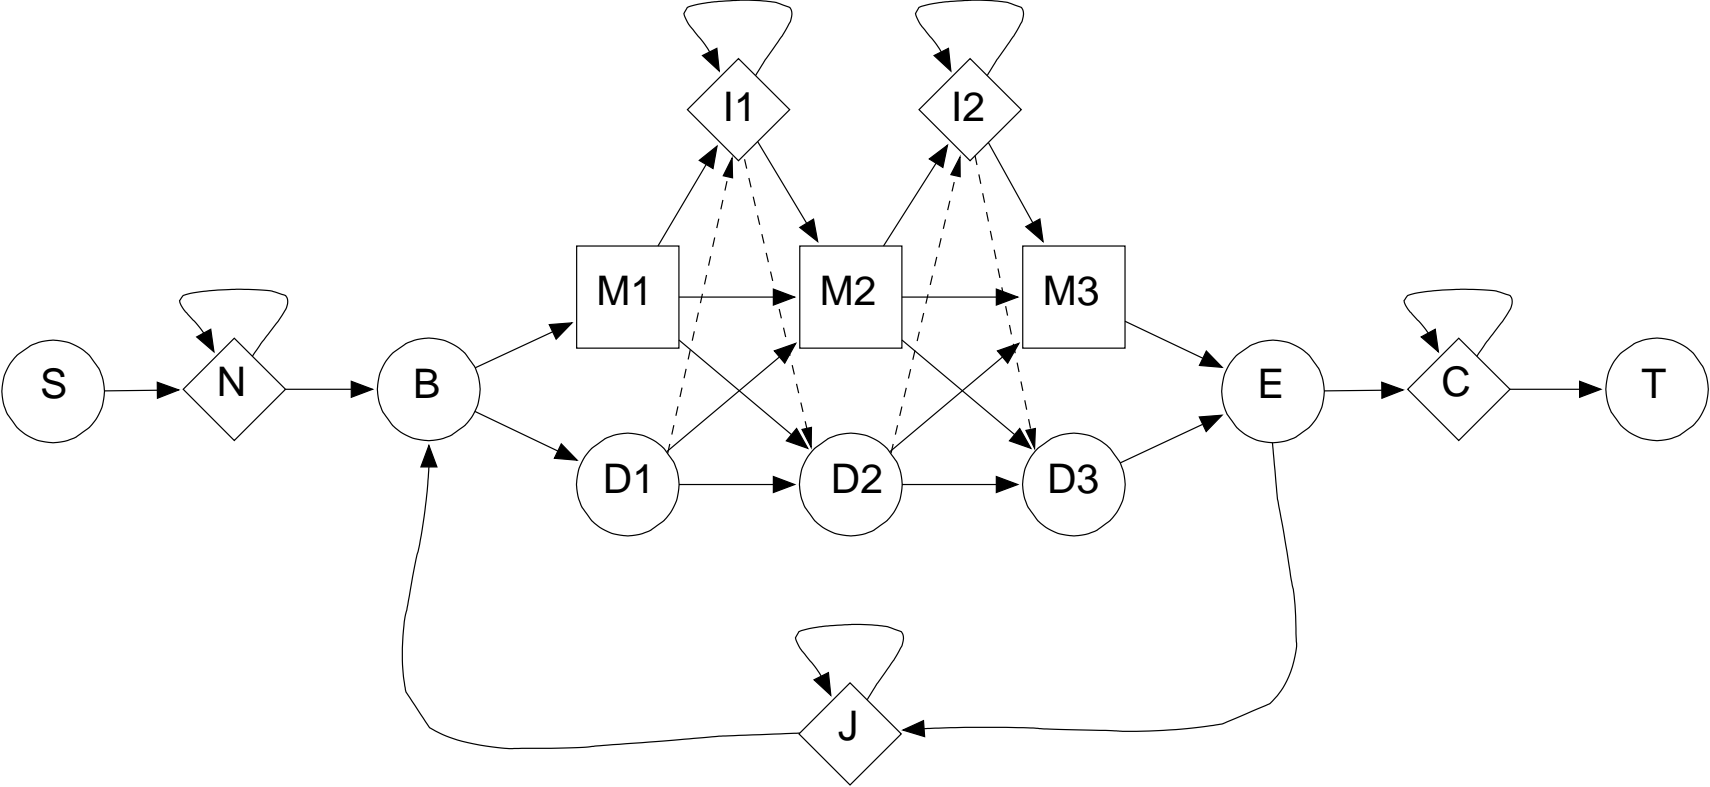

Supplement: 12859_2003_123_MOESM1_ESM.pdf [file 12859_2003_123_MOESM1_ESM.pdf]
